# Supplementary material for: Initiator-dependent kinetics of lyotropic liquid crystal-templated thermal polymerization
Source: Royal Society of Chemistry journal article supplement (doi:10.1039/d1py00127b), 2021-01-01
Supplement: d1py00127b1.pdf [file d1py00127b1.pdf]

## Supporting Information

# Initiator-dependent kinetics of lyotropic liquid crystal-templated thermal polymerization

Younes Saadat,<sup>1</sup> Kyungtae Kim,<sup>2</sup> Reza Foudazi<sup>1\*</sup>

<sup>1</sup> *Department of Chemical and Materials Engineering, New Mexico State University, Las Cruces, NM 88003, USA*

<sup>2</sup> *Materials Physics and Applications Division, Center for Integrated Nanotechnologies, Los Alamos National Laboratory, Los Alamos, NM 87545, USA*

---

\* *Corresponding author. MSC 3805, P. O. Box 30001, Las Cruces, NM, 88003-3805, USA, Email: [rfoudazi@nmsu.edu](mailto:rfoudazi@nmsu.edu).*

## Gap dependency test for rheological measurements

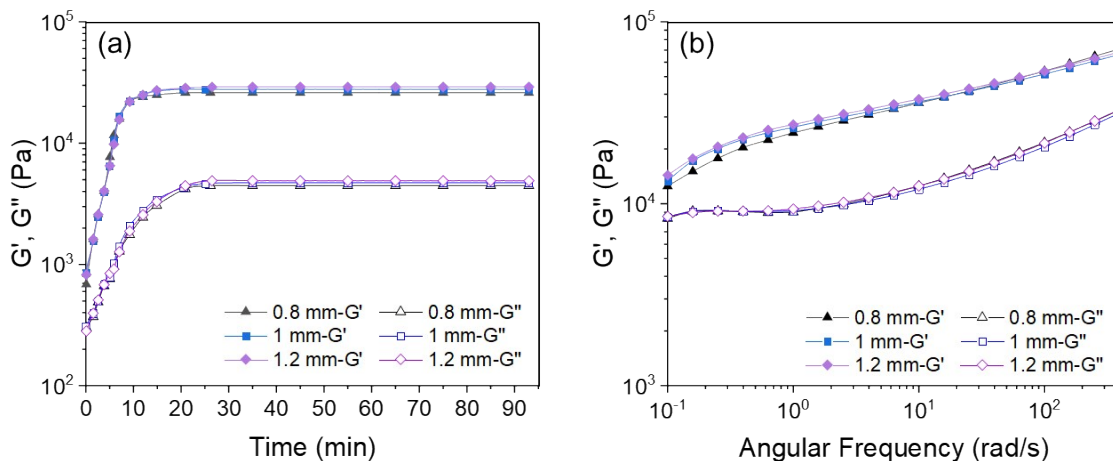

**Fig. S1.** Confirming the absence of wall slip during rheological measurements: typical rheological behavior of the sample with lamellar LLC structure (a) during polymerization by APS and (b) after polymerization under different gaps between the measuring plates.

## Typical raw data for DSC analysis

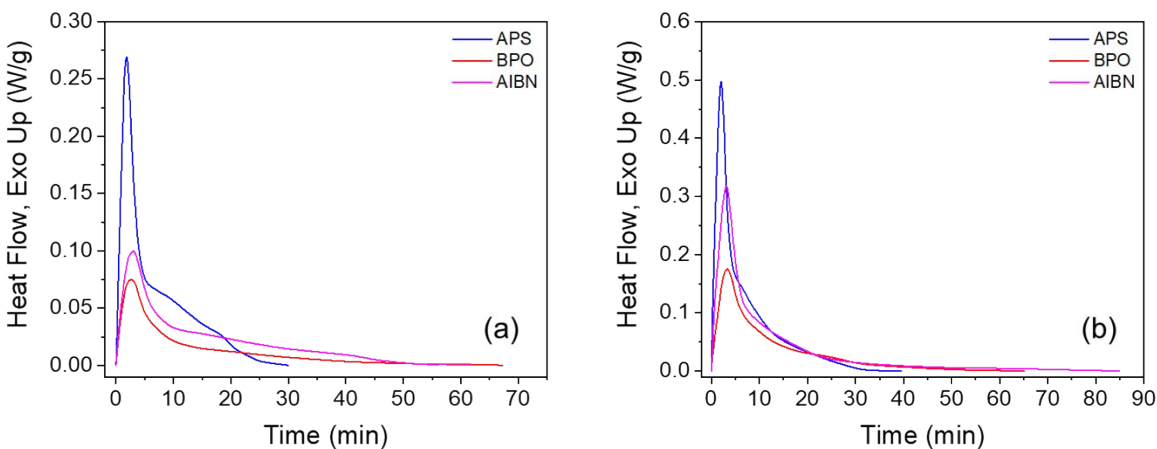

**Fig. S2.** Typical raw DSC data for the polymerization in (a) lamellar and (b) hexagonal structures using different initiators. The heat flow has been normalized to the total weight of the mesophase used for the analysis (not total monomer content).

## Theoretical concentration of the free radicals generated by different initiators over time

The theoretical cumulative concentration of free radicals generated through the decomposition of initiators was calculated by the following equation:<sup>1</sup>

$$[R] = 2f[I]_0(1 - e^{-k_d t})$$

Where  $[R]$ ,  $f$ ,  $[I]_0$ ,  $k_d$  and  $t$  are the cumulative concentration of free radicals, the initiator efficiency, initial concentration of the initiator, decomposition rate constant of the initiator, and time, respectively. The average value of 0.5 is commonly used for  $f$  in the case of AIBN.<sup>2</sup> However, there is not a firm average value reported in the literature for BPO<sup>3</sup> and APS.<sup>4</sup> Therefore, to cancel out the effect of  $f$ , we normalized  $[R]$  to  $f$ , resulting in the following equation:

$$\frac{[R]}{f} = 2[I]_0(1 - e^{-k_d t})$$

It should be noted that this calculation was made just to have a comparison among different initiators in terms of difference in the rate of free radical generation over time. So, the presented concentrations do not reflect the actual free radical concentration during LLC templating.

The calculation was made for the monomer content used in the formulation of lamellar structure (the calculation itself does not depend on the LLC structure) at three different temperatures. To do so, the values shown in Table S1 was used for  $k_d$  of different initiators. To calculate the  $k_d$  values, the activation energy, pre-exponential factor, and  $k_d$  at the reference temperature were obtained from the literature for different initiators.<sup>2,4-7</sup>  $k_d$  was then calculated at the desired temperature using Arrhenius equation. The initial concentration for all of the initiators was 0.33 M with respect to the total monomer content.

**Table S1.** Decomposition rate constant of different initiators at different temperatures.<sup>2,4-7</sup>

| Initiator | T (°C) | $k_d$ (s <sup>-1</sup> ) |
|-----------|--------|--------------------------|
| APS       | 55     | $2.54 \times 10^{-6}$    |
|           | 65     | $1.09 \times 10^{-5}$    |
|           | 75     | $4.36 \times 10^{-5}$    |
| AIBN      | 55     | $6.18 \times 10^{-6}$    |
|           | 65     | $2.53 \times 10^{-5}$    |
|           | 75     | $9.57 \times 10^{-5}$    |
| BPO       | 55     | $2.04 \times 10^{-6}$    |
|           | 65     | $7.85 \times 10^{-6}$    |
|           | 75     | $2.79 \times 10^{-5}$    |

To make similar calculations for the systems in which the combination of two initiators with total concentration of 5 mol% is used (2.5 mol% APS + 2.5 mol% AIBN or 2.5 mol% APS + 2.5 mol% BPO), the following equation was used. In these samples, the initial concentration for each initiator was 0.165 M.

$$\frac{[R]}{f} = \frac{[R]_{APS}}{f_{APS}} + \frac{[R]_{AIBN \text{ or } BPO}}{f_{AIBN \text{ or } BPO}}$$

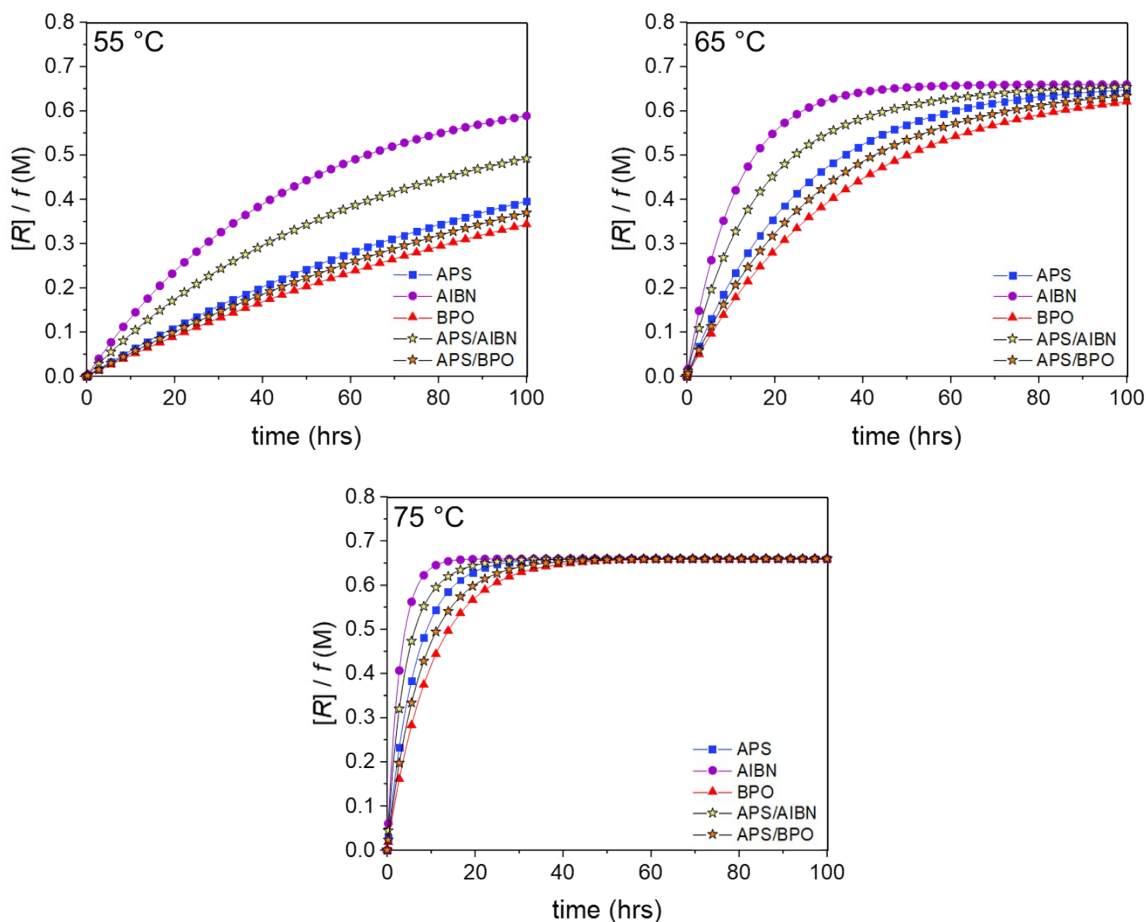

**Fig. S3.** Normalized theoretical concentration of the free radicals generated by different initiators over time at three different temperatures.

### Scaling of maximum polymerization rate with initiator concentration

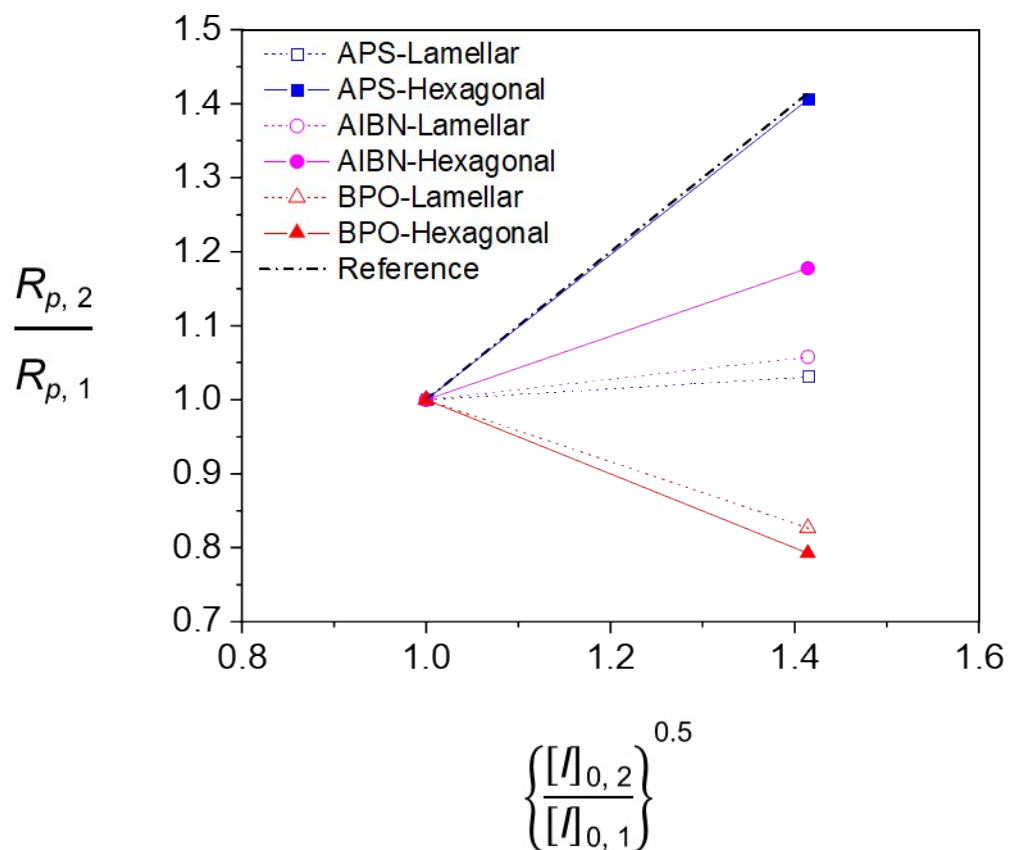

**Fig. S4.** Change in maximum polymerization rate in lamellar and hexagonal structures with a change in the content of different initiators.  $R_{p,1}$  and  $R_{p,2}$  are the maximum polymerization rate when initial initiator content of  $[I]_{0,1}$  and  $[I]_{0,2}$  are used respectively. For different polymerization systems,  $[I]_{0,1}$  and  $[I]_{0,2}$  are initiator content of 2.5 and 5 mol% with respect to the total monomer content, respectively. In this figure, “Reference” represents the relation of reaction rate with the square root of initial initiator concentration,  $R_p \propto ([I]_0)^{0.5}$ . The lines connecting the data point are added as a guide for the eye.

### Change of overall kinetics rate coefficient with temperature

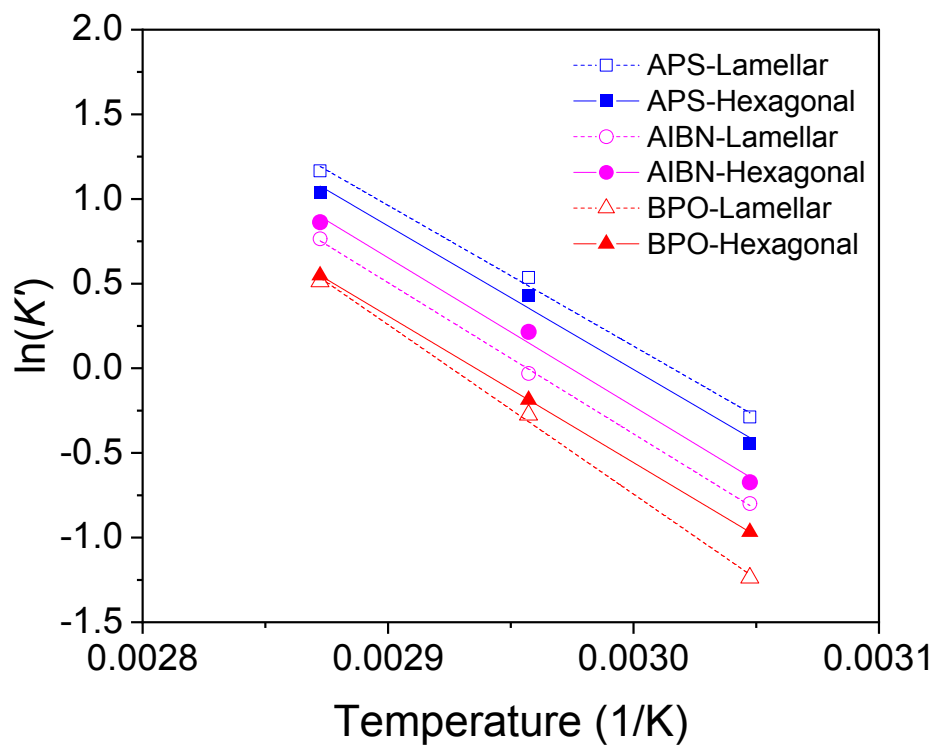

**Fig. S5.** Overall kinetics rate coefficient vs temperature in lamellar and hexagonal structures using different initiators. Lines are linear fits to data. For APS-initiated system,  $K'$  are bigger in lamellar structure compared to hexagonal one in all of the temperatures. The opposite trend is observed for the reactions initiated by AIBN and BPO.

## References

- 1 G. Odian, in *Principles of Polymerization*, John Wiley & Sons, Inc., Hoboken, NJ, USA, 2004.
- 2 G. Moad, *Prog. Polym. Sci.*, 2019, **88**, 130–188.
- 3 D. S. Achilias and I. D. Sideridou, *Macromolecules*, 2004, **37**, 4254–4265.
- 4 M. Schneider, C. Graillat, S. Boutti and T. F. McKenna, *Polym. Bull.*, 2001, **47**, 269–275.
- 5 UI\_NOROX\_Broschüre\_DS, [https://www.united-initiators.com/wp-content/uploads/2017/03/UI\\_NOROX\\_Broschüre\\_DS.pdf](https://www.united-initiators.com/wp-content/uploads/2017/03/UI_NOROX_Broschüre_DS.pdf).
- 6 Akzonobel, Initiators\_for\_High\_Polymers, [http://www.neochemical.kz/File/Akzo\\_Data\\_110407-Initiators\\_for\\_High\\_Polymers.pdf](http://www.neochemical.kz/File/Akzo_Data_110407-Initiators_for_High_Polymers.pdf).
- 7 A. I. Lowell and J. R. Price, *J. Polym. Sci.*, 1960, **43**, 1–12.
